# Supplementary material for: In-Depth Matrisome and Glycoproteomic Analysis of Human Brain Glioblastoma Versus Control Tissue
Source: PubMed Central journal article supplement (PMC8957055; doi:10.1016/j.mcpro.2022.100216), 2022-02-23

1. sp|Q96GW7|PGCB\_HUMAN Brevican core protein  
 EVGEATGGPELSGVPRE (O-Glycosylation)GVPR{Hex:1; HexNAc:1; Neu5Ac:1} (S625)

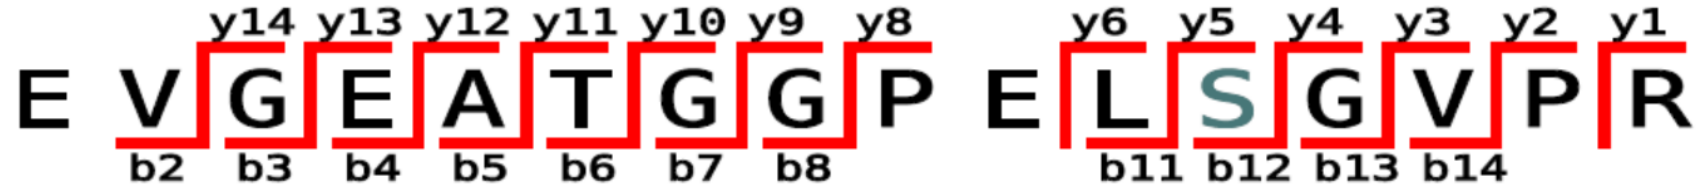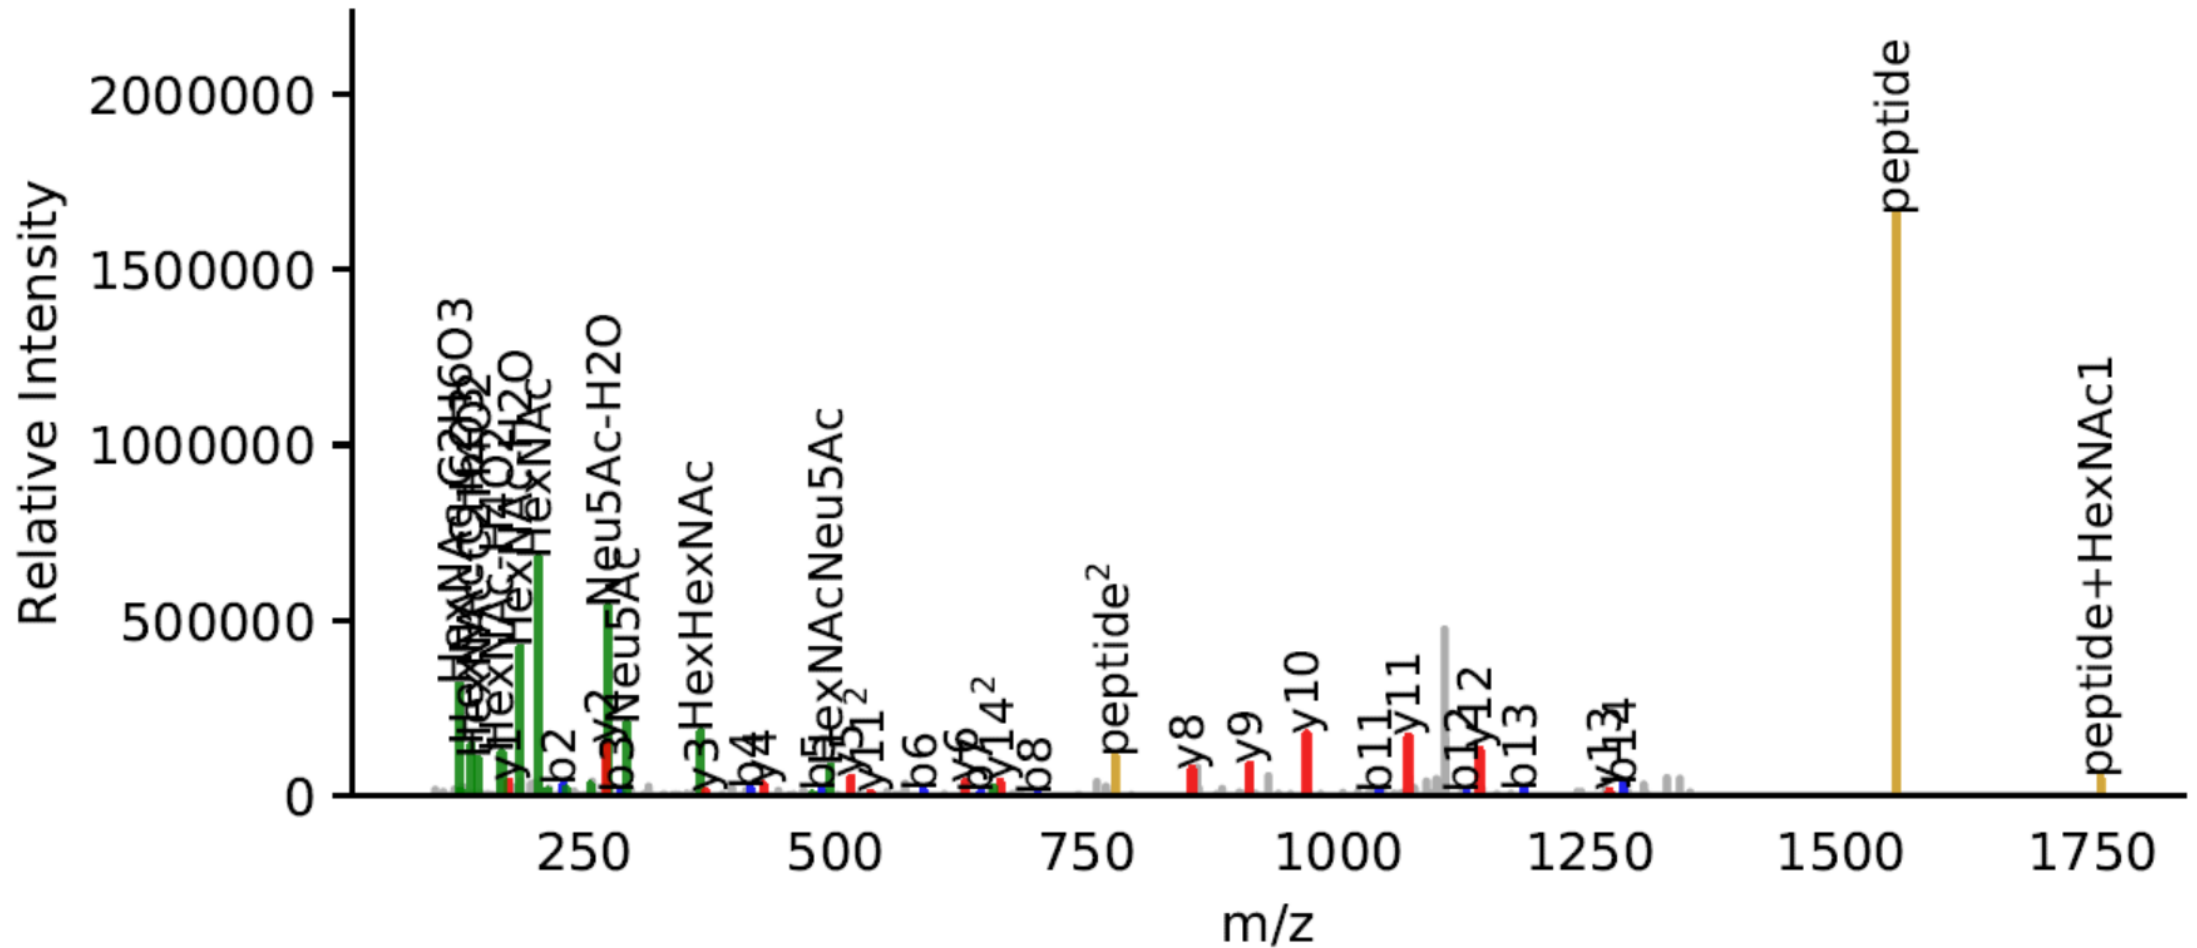

2. sp|Q96GW7|PGCB\_HUMAN Brevican core protein  
 VHGPPT(O-Glycosylation)ETLPTP{Hex:2; HexNAc:2} (T590)

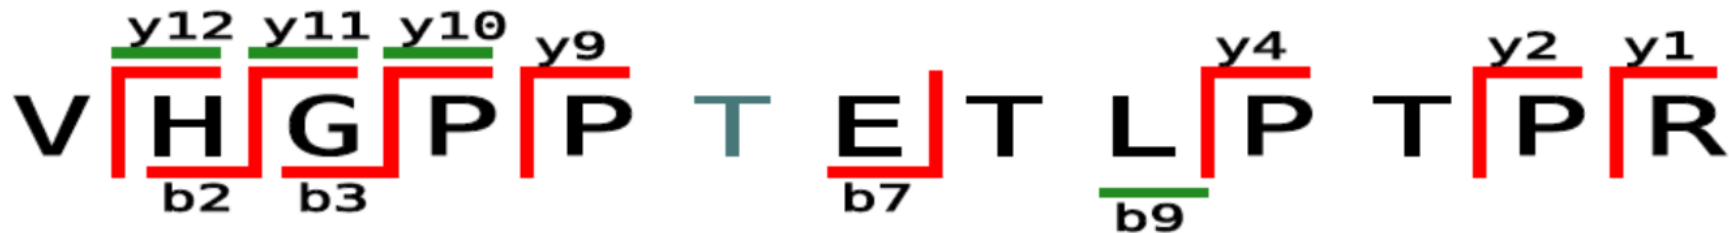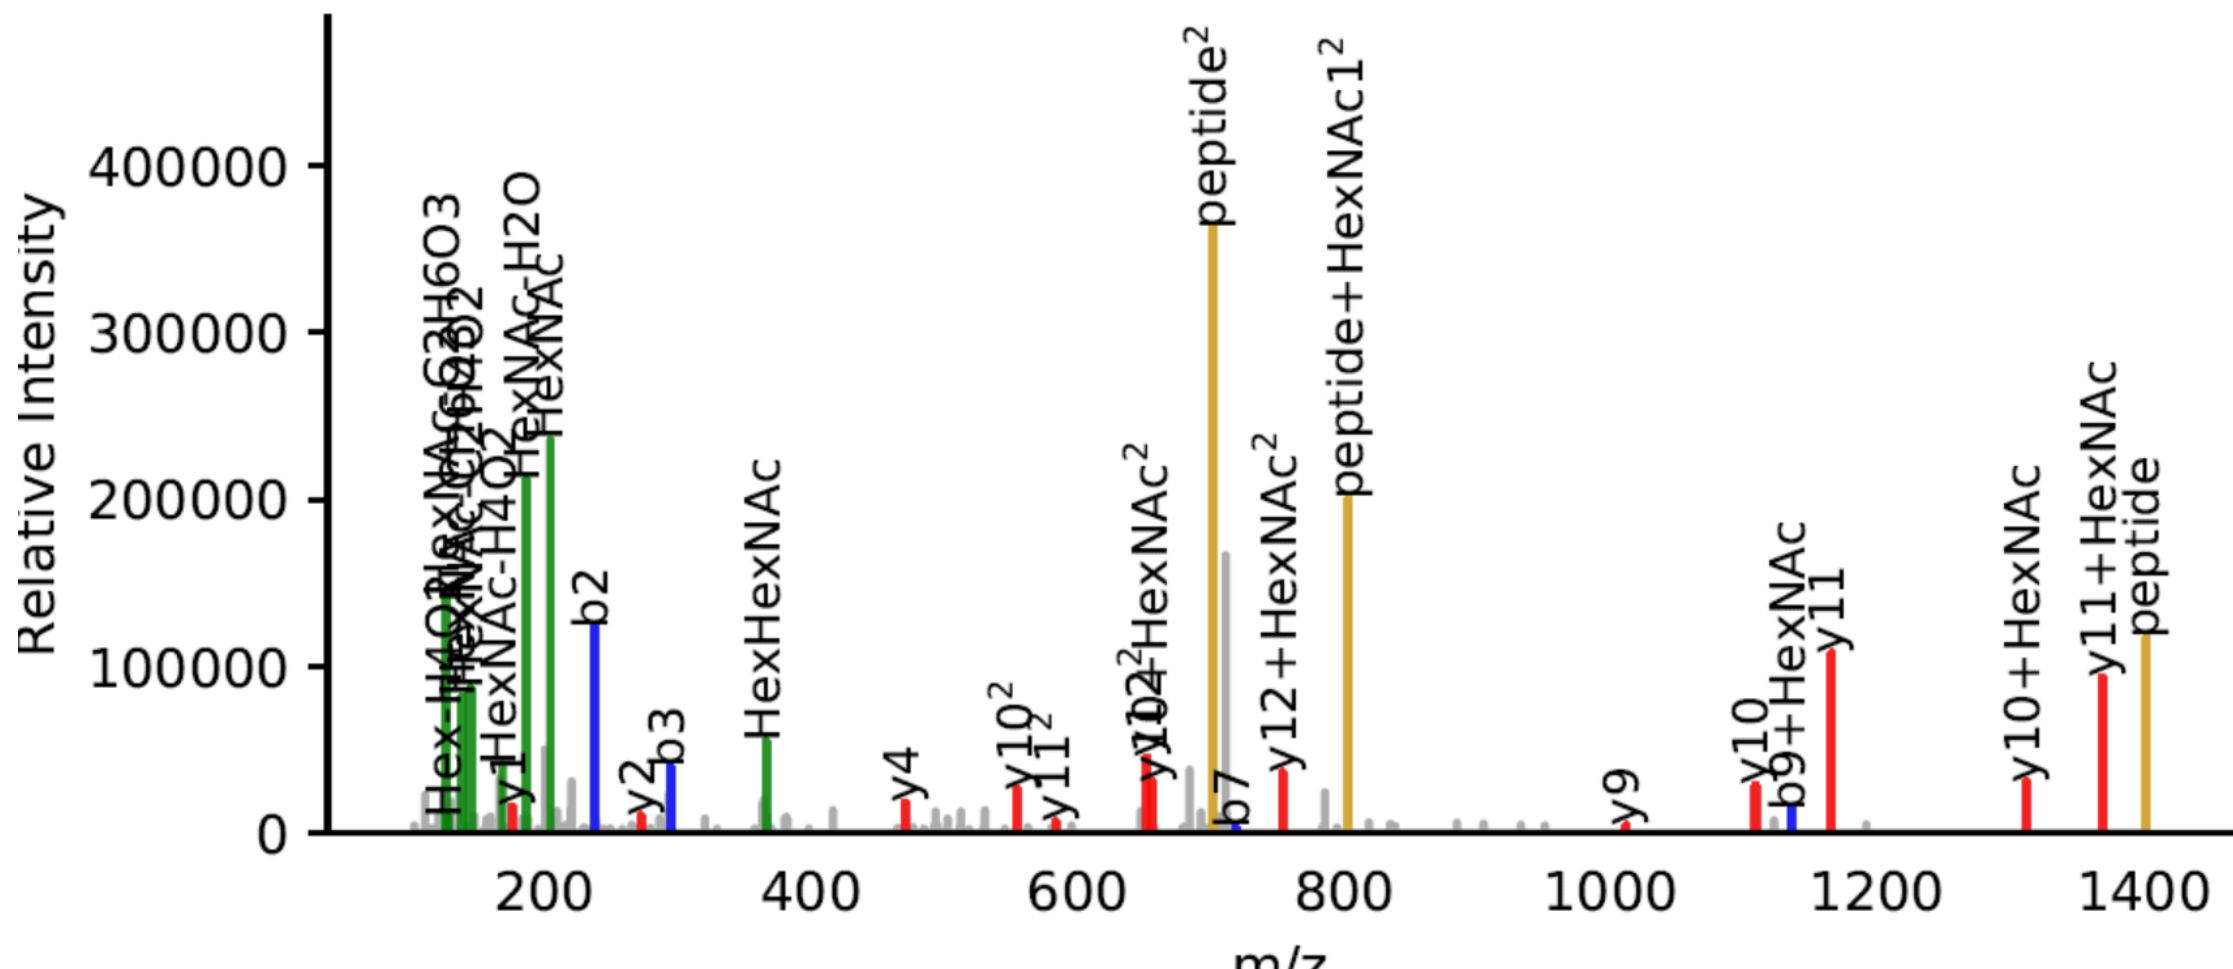

3&5 sp|Q96GW7|PGCB\_HUMAN Brevican core protein  
 VHGPPT(O-Glycosylation)ETLPTPR{Hex:2; HexNac:2; Neu5Ac:1}(T590)

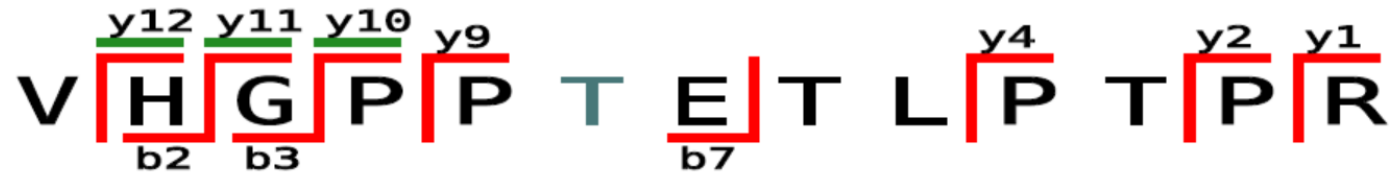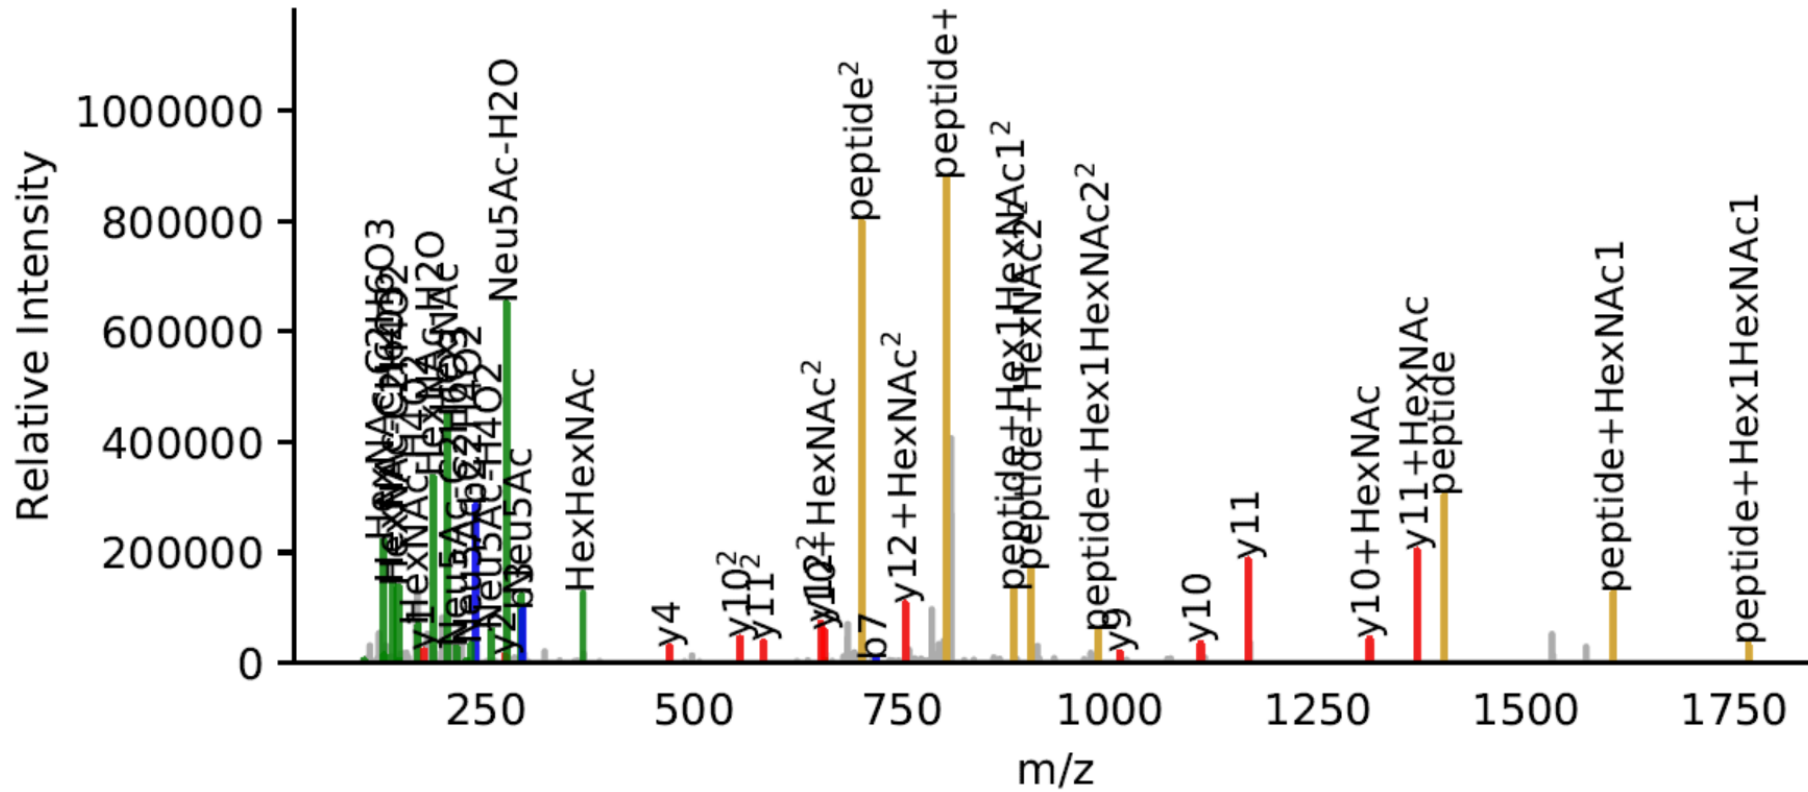

4&8. sp|Q92823|NRCAM\_HUMAN Neuronal cell adhesion molecule OS=Homo sapiens OX=9606 GN=NRCAM  
 PE=1 SV=3  
 VNVVN(N-Glycosylation)STLAEVHWDPVPLK{Hex:5; HexNAc:2}(N908)

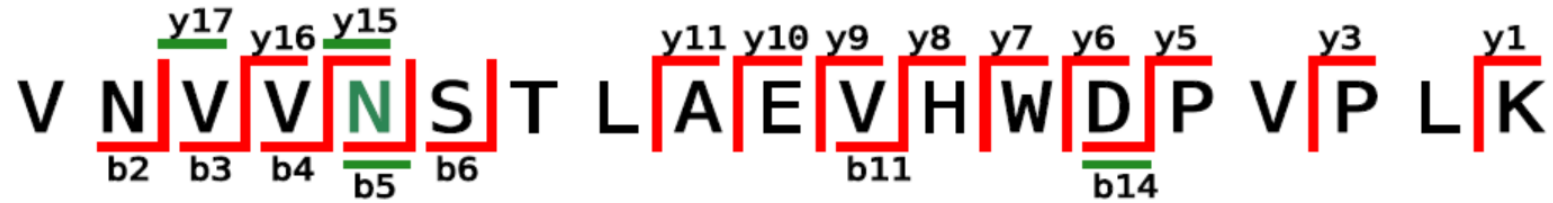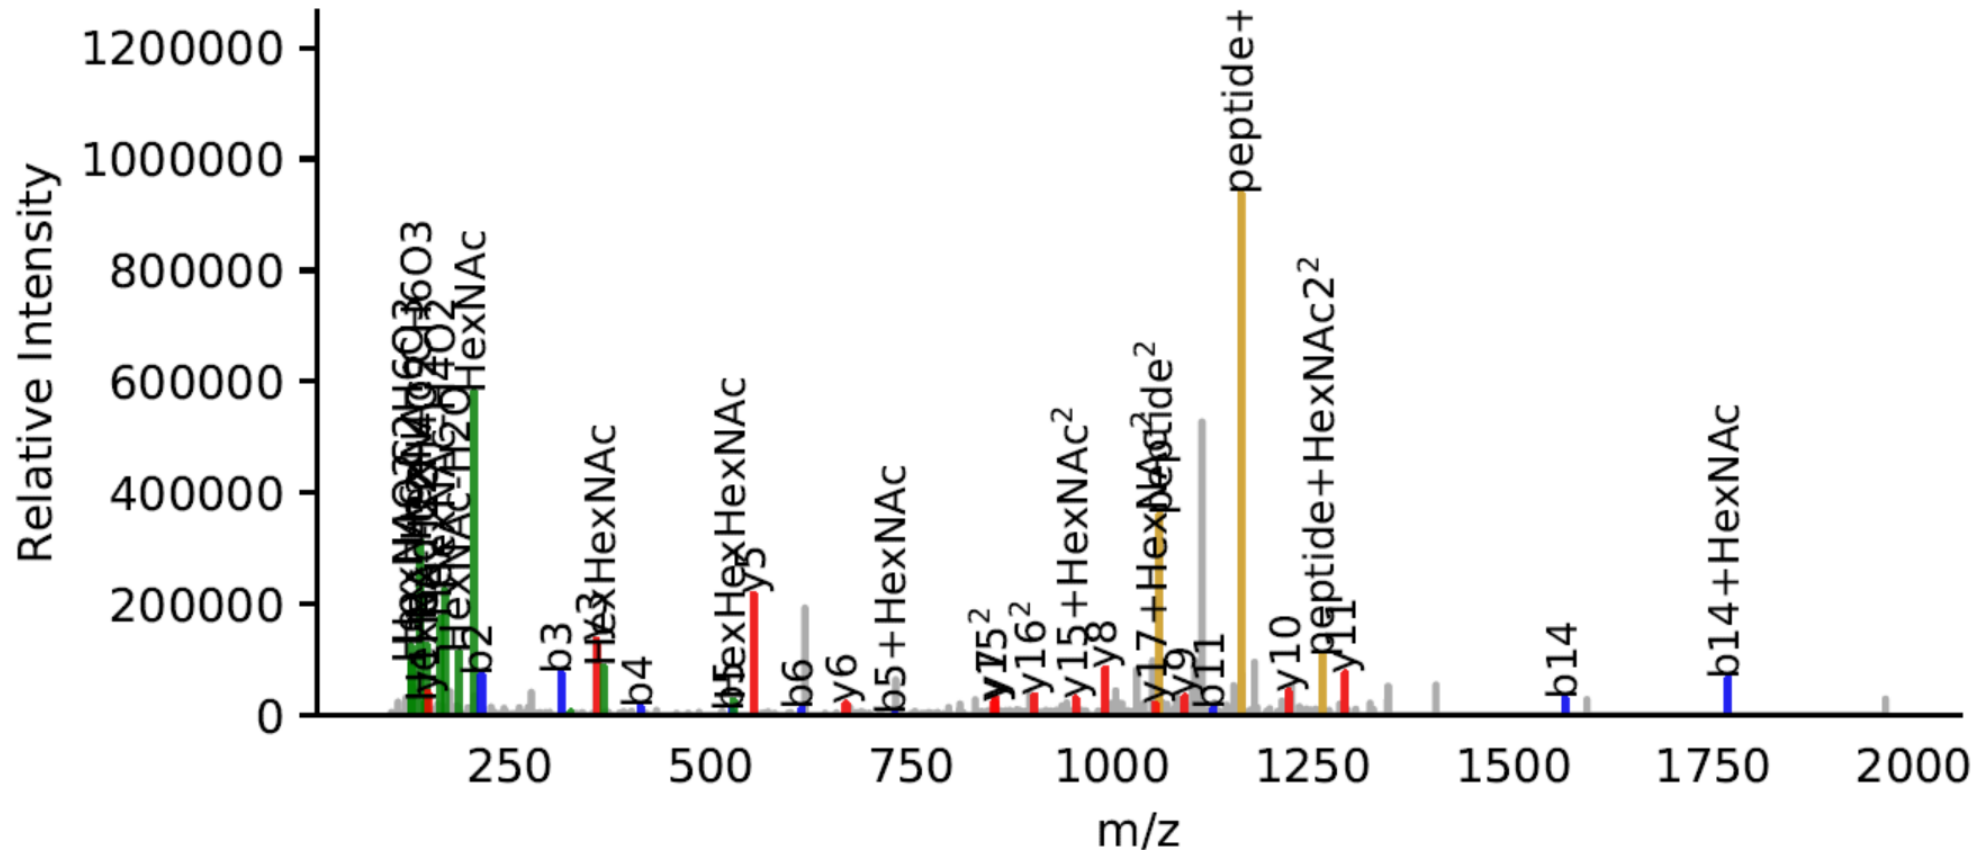

6. sp|P07339|CATD\_HUMAN Cathepsin D OS=Homo sapiens OX=9606 GN=CTSD PE=1 SV=1  
 GSLSYLN(N-Glycosylation)VTR{Hex:5; HexNAc:2} (N313)

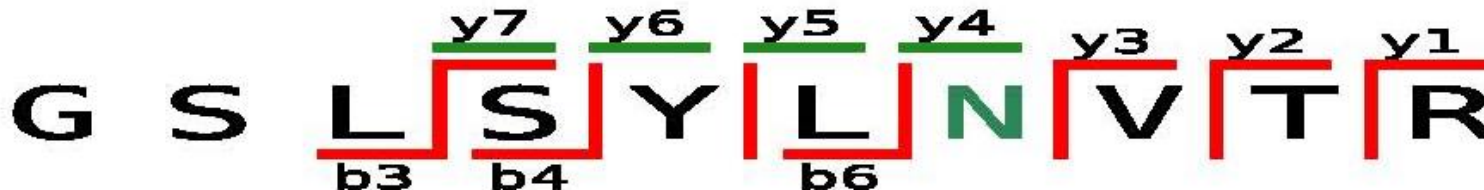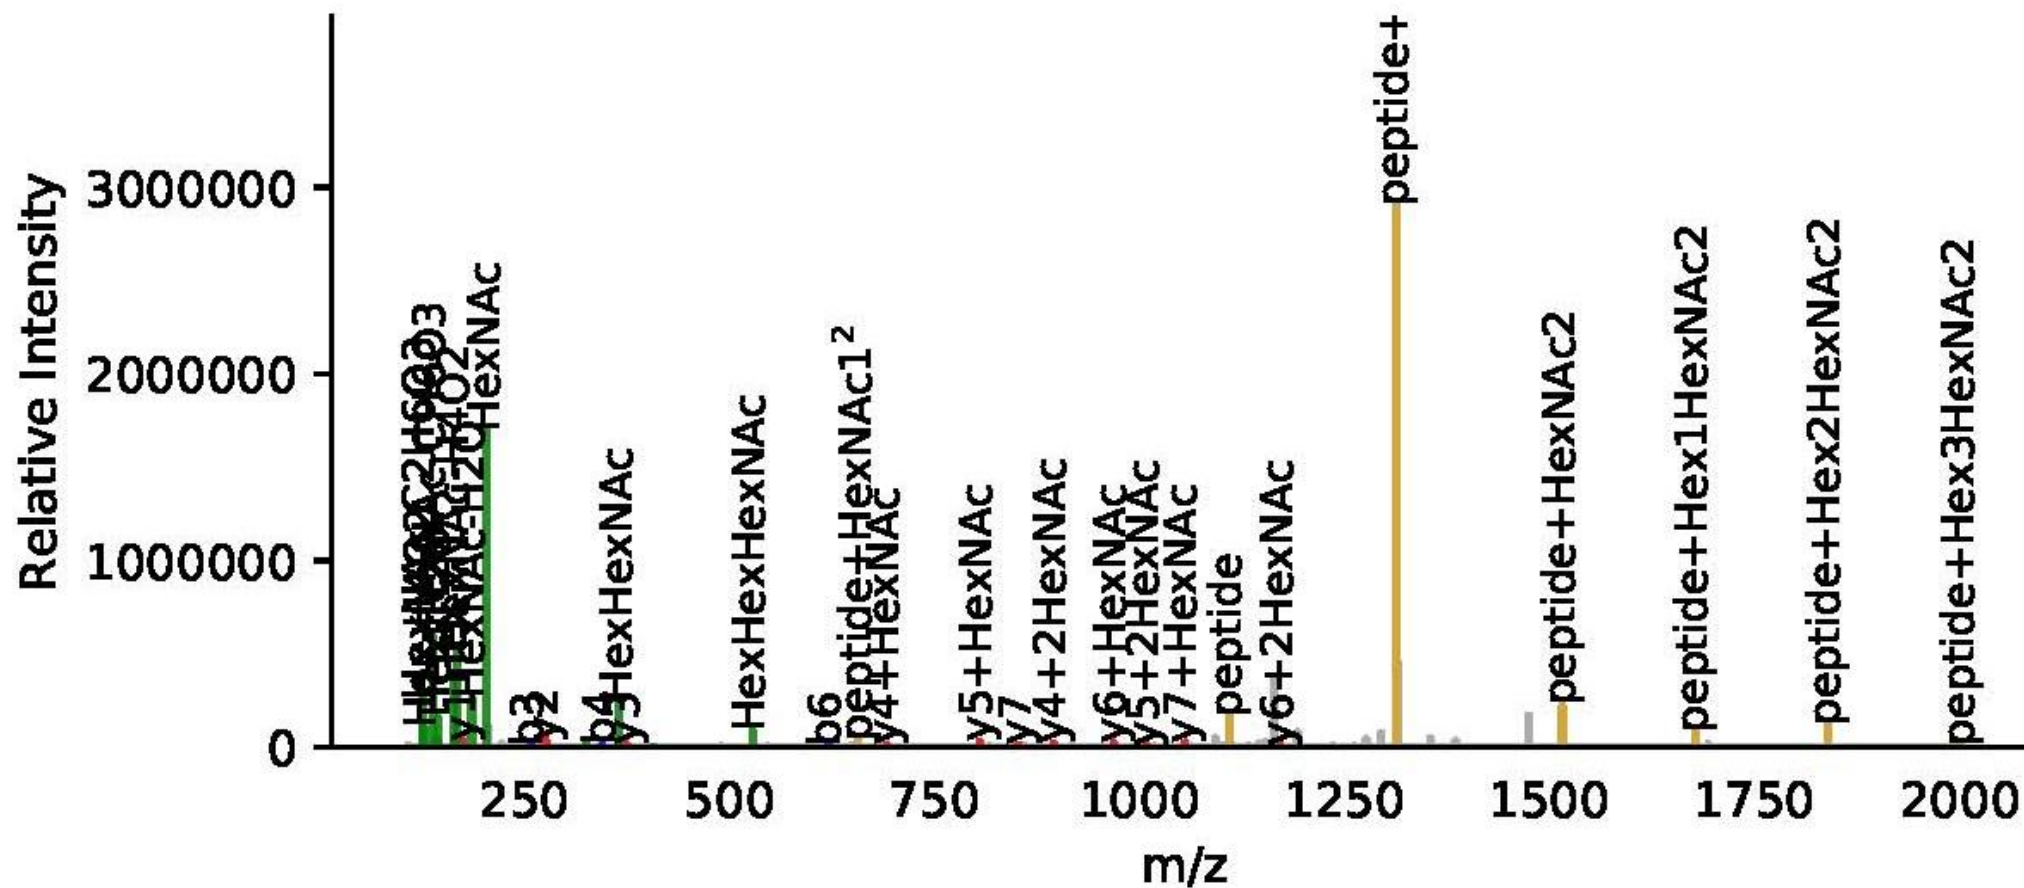

7. sp|P07339|CATD\_HUMAN Cathepsin D OS=Homo sapiens OX=9606 GN=CTSD PE=1 SV=1  
 GSLSYLN(N-Glycosylation)VTR{Hex:6; HexNAc:2} (N313)

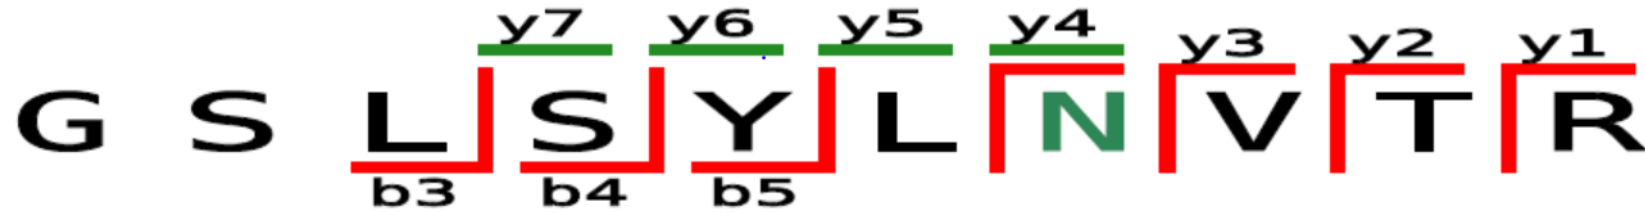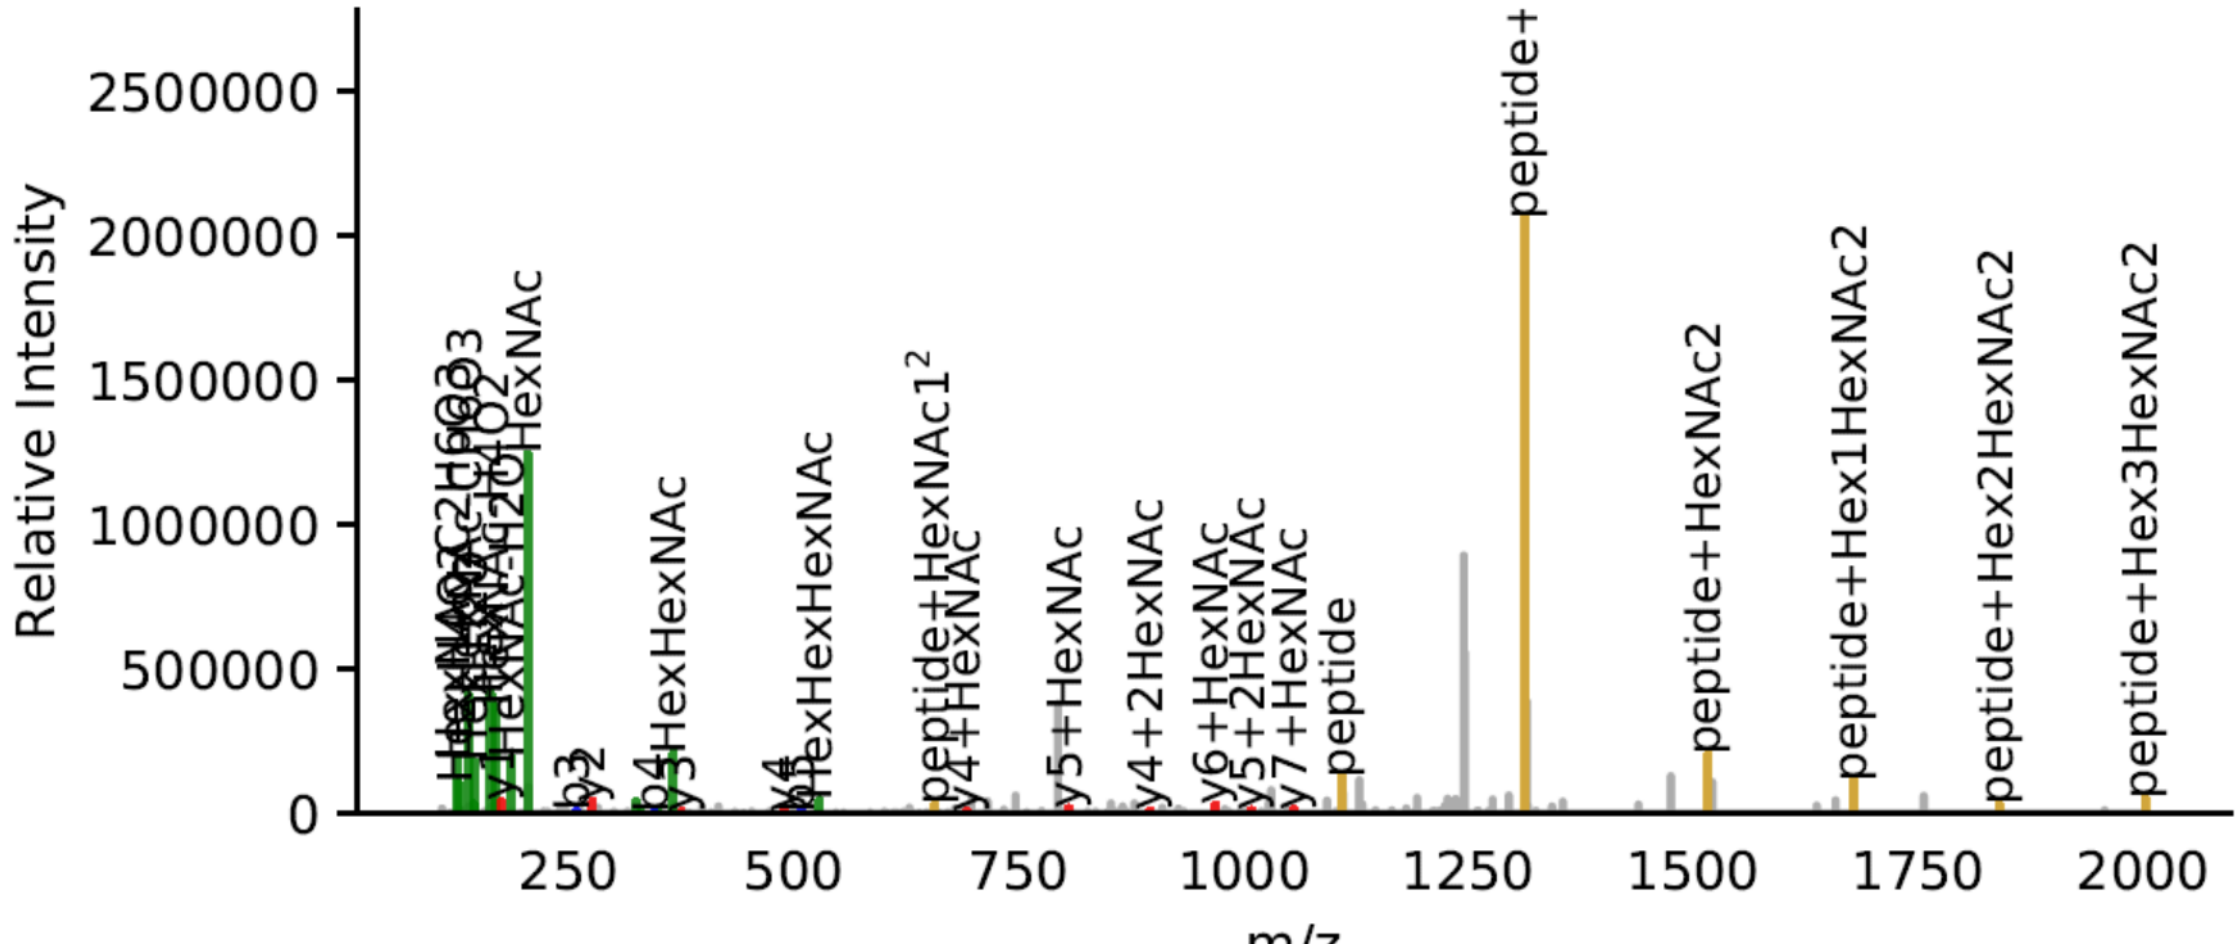



9. sp|Q92823|NRCAM\_HUMAN Neuronal cell adhesion molecule OS=Homo sapiens OX=9606 GN=NRCAM PE=1 SV=3

FN(N-Glycosylation)HTQTIQQK{Hex:5; HexNAc:2} (N996)

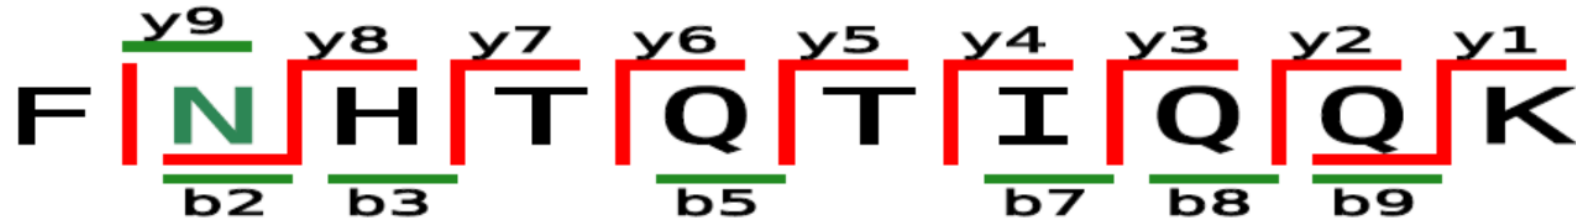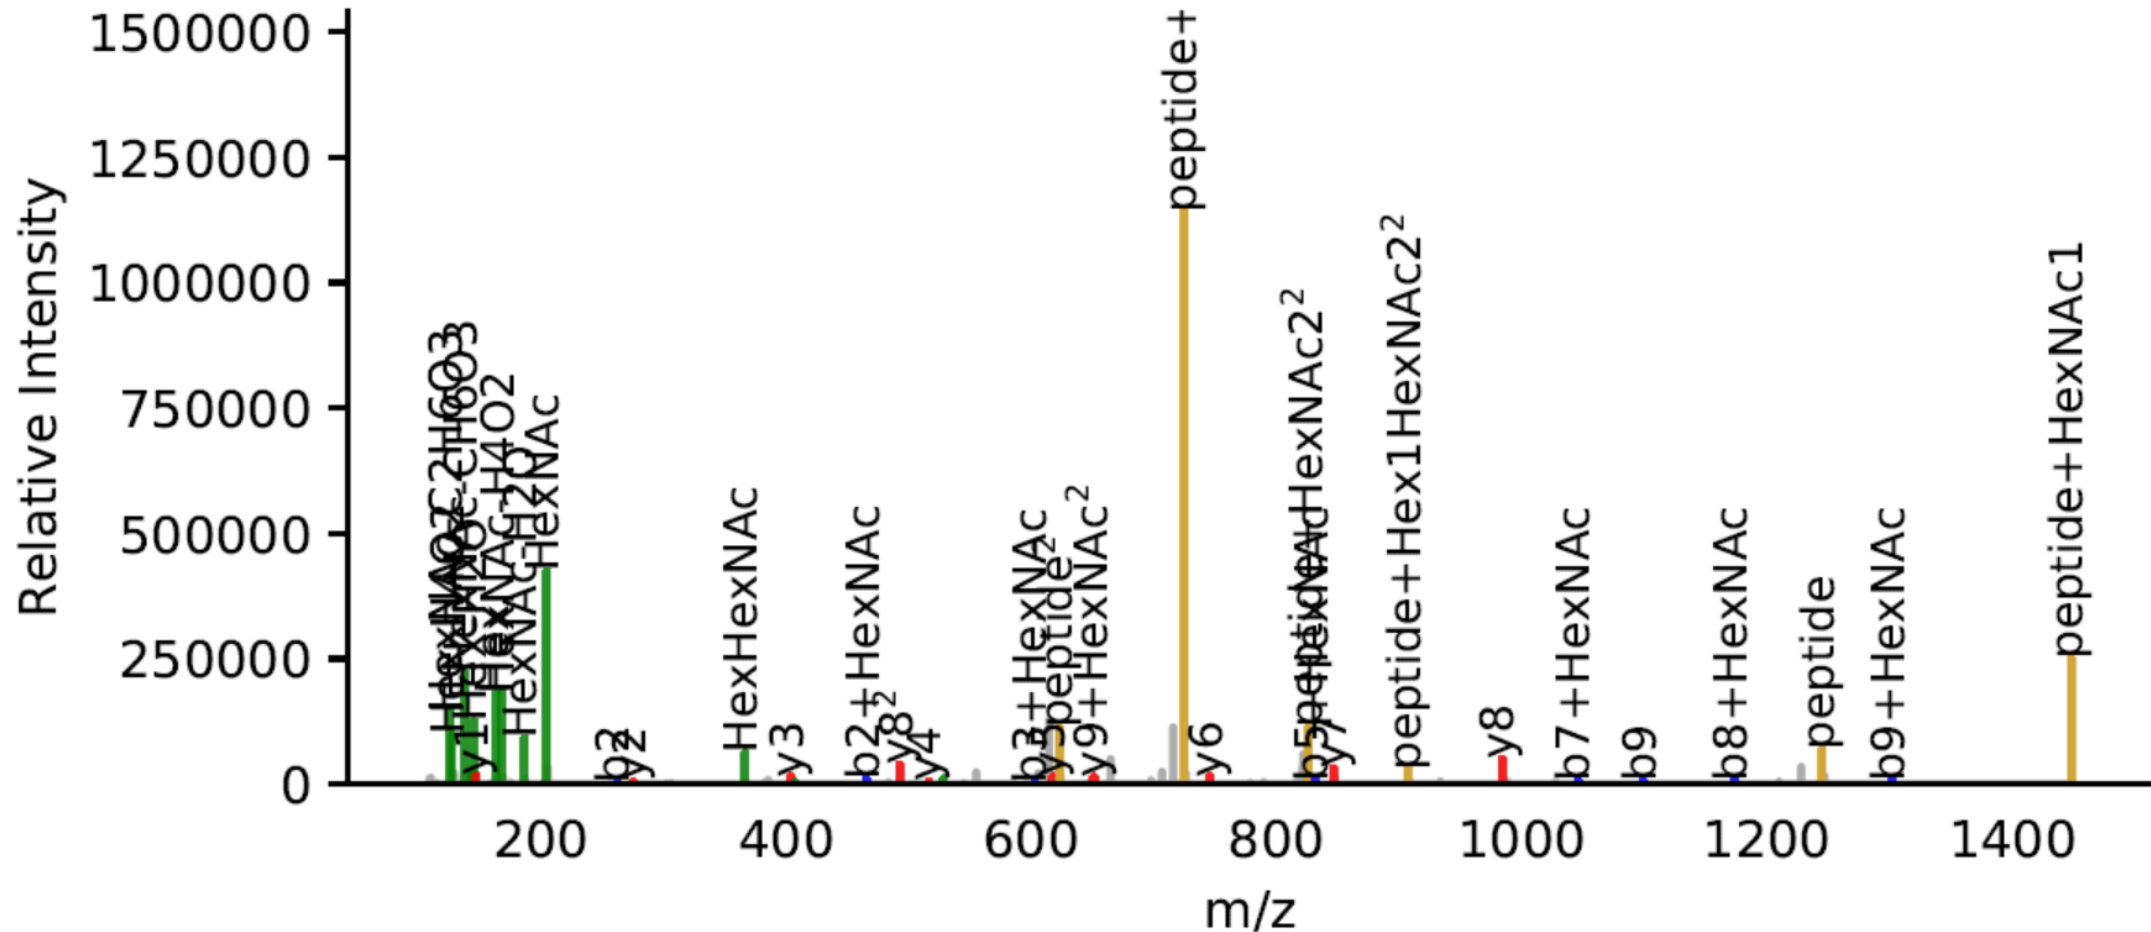

10 and 14. sp|P11279|LAMP1\_HUMAN Lysosome-associated membrane glycoprotein 1 OS=Homo sapiens OX=9606  
 GN=LAMP1 PE=1 SV=3  
 LLNINPN(N-Glycosylation)KT{Hex:5; HexNAc:2} (N311)

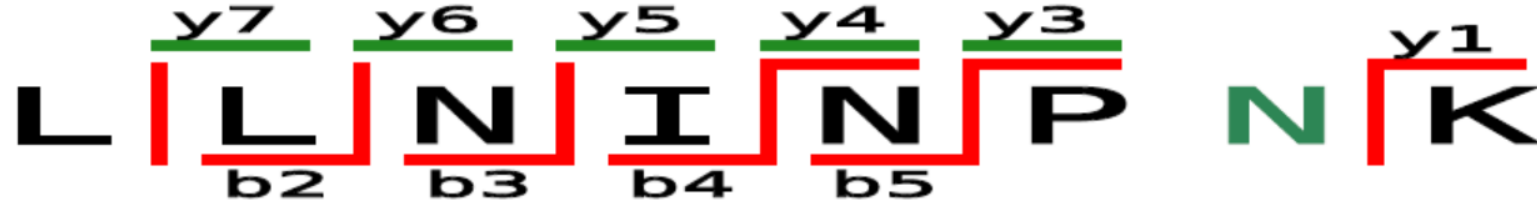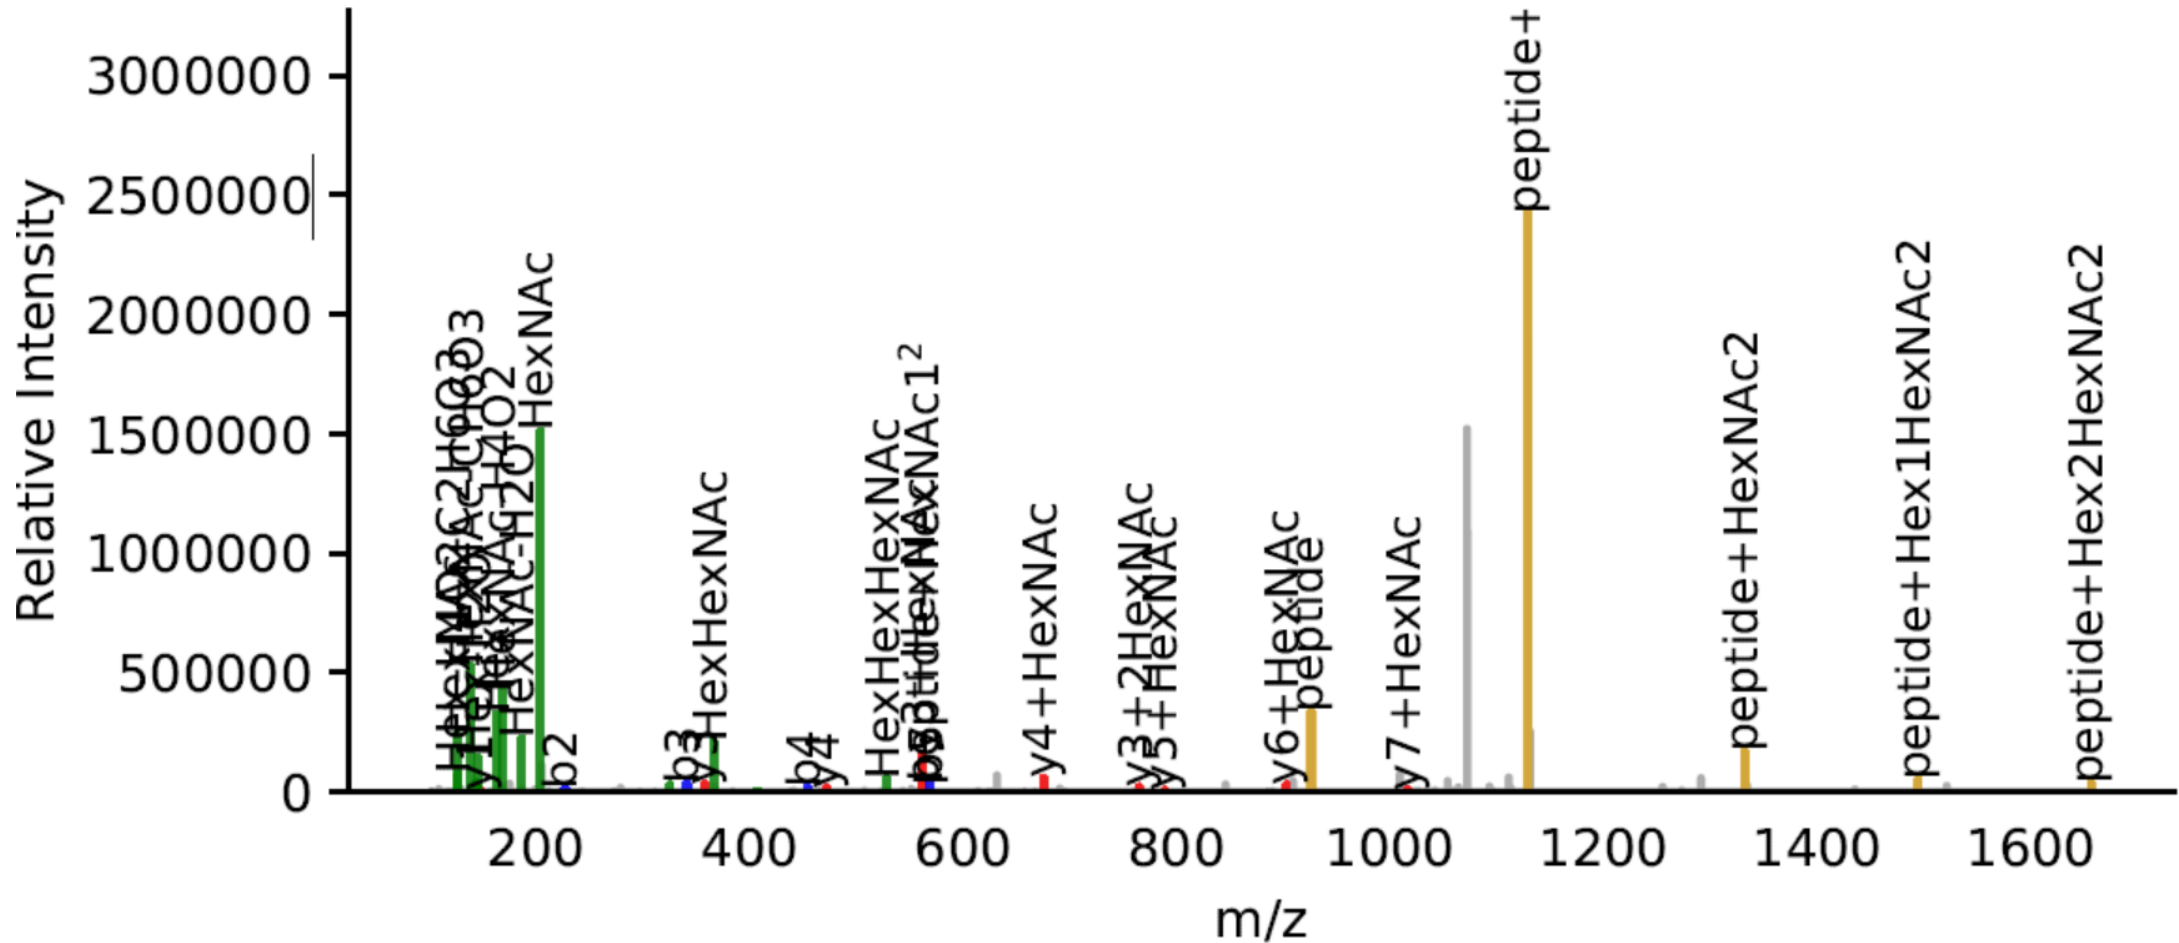



11. sp|P13611|CSPG2\_HUMAN Versican core protein OS=Homo sapiens OX=9606 GN=VCAN PE=1 SV=3  
 FQPTTST(O-Glycosylation)GIAEK{Hex:4; HexNac:4} (T939)

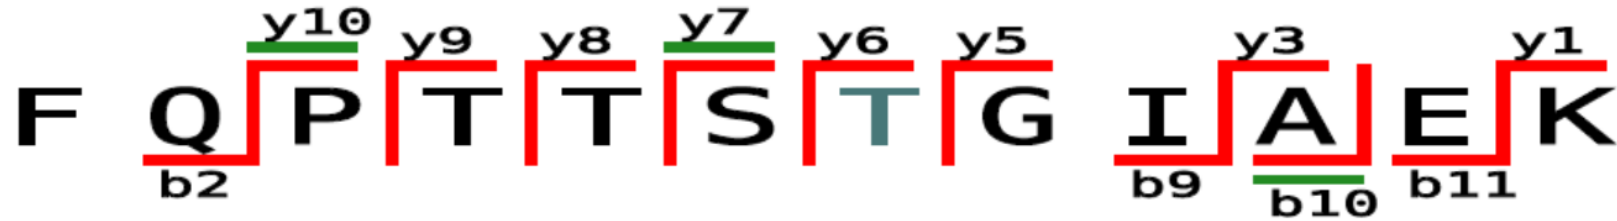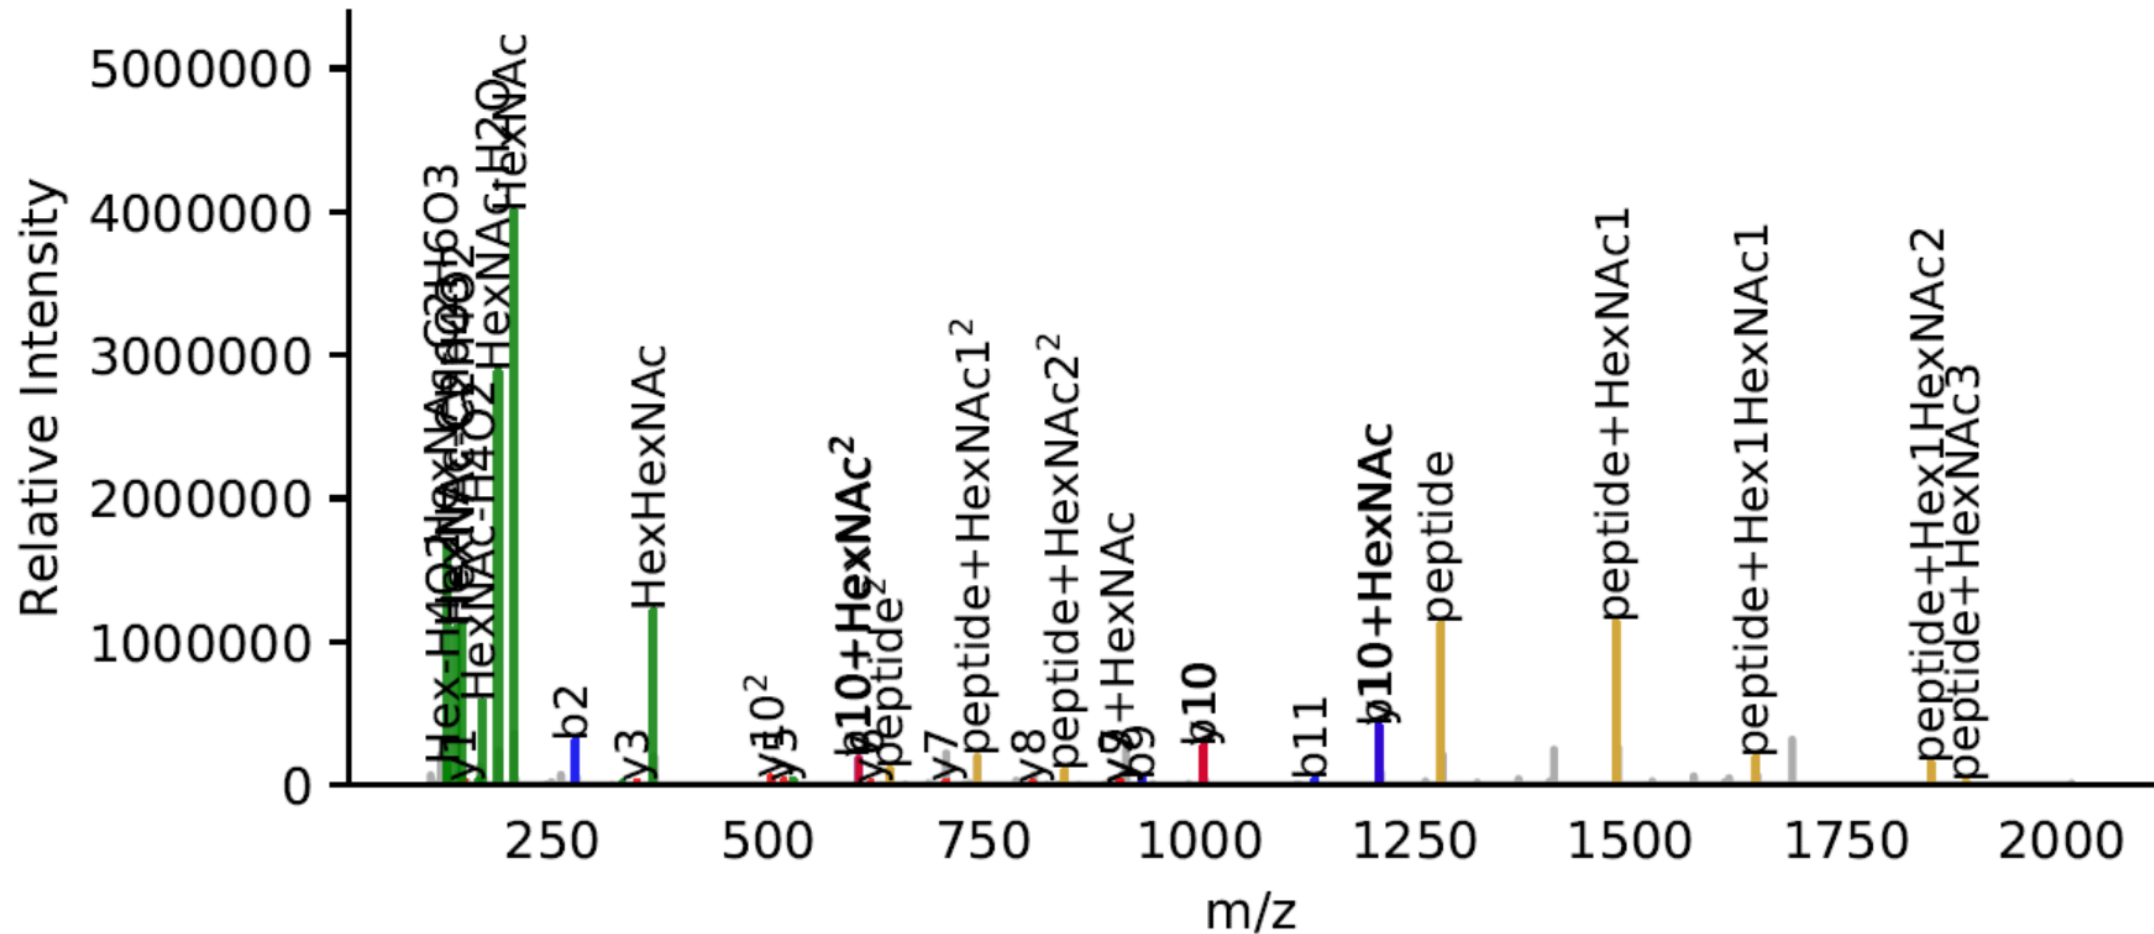



13. sp|O00468|AGRIN\_HUMAN Agrin OS=Homo sapiens OX=9606 GN=AGRN PE=1 SV=6  
 LPSSAVT(O-Glycosylation)PR{HexNAc:2} (T1335)

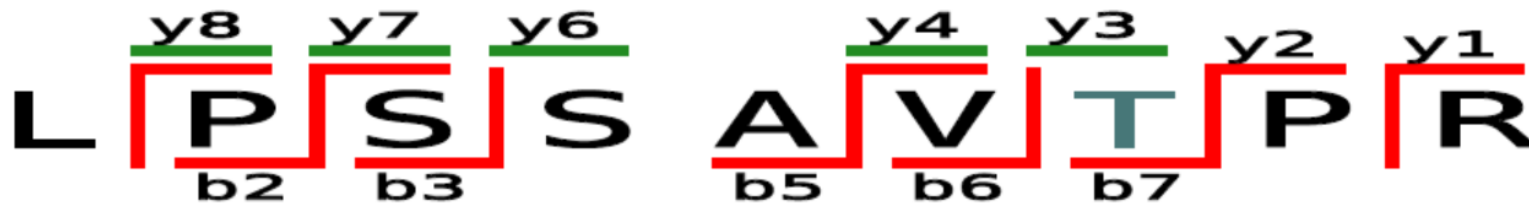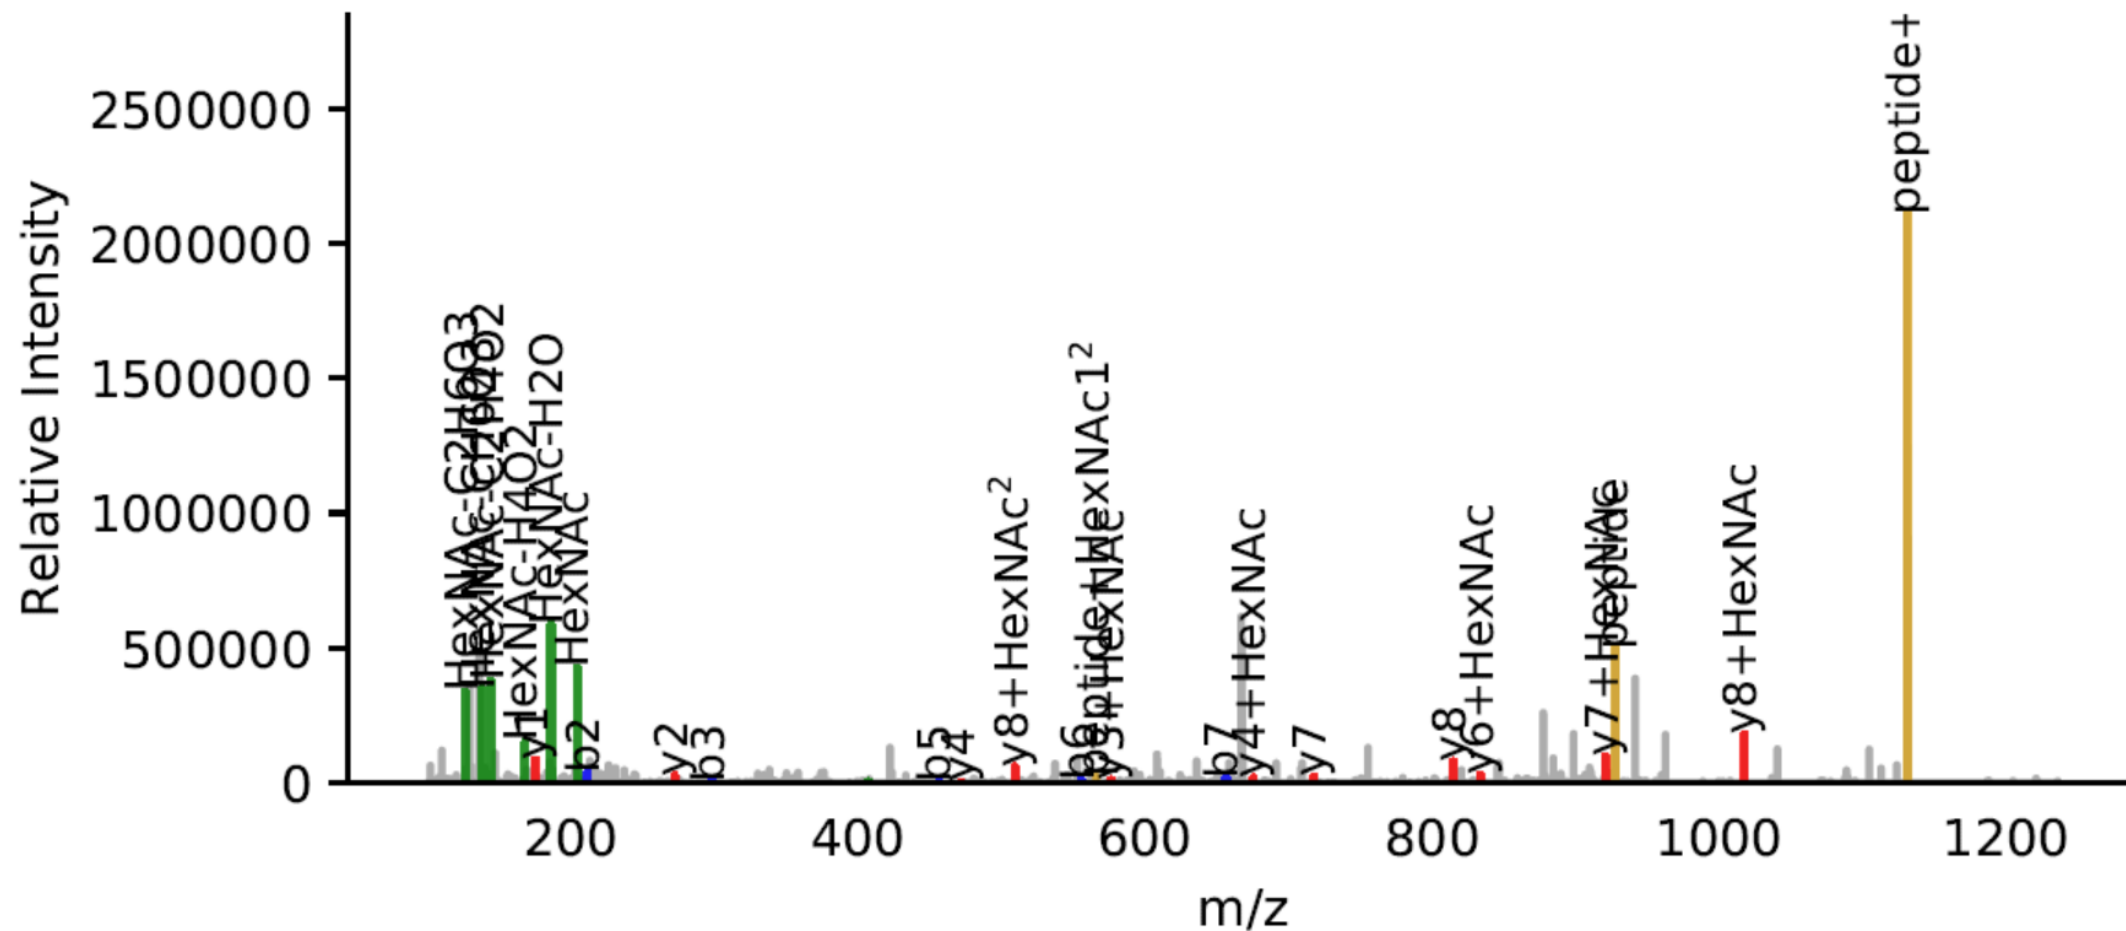



16. sp|P01859|IGHG2\_HUMAN Immunoglobulin heavy constant gamma 2 OS=Homo sapiens OX=9606 GN=IGHG2  
 PE=1 SV=2  
 EEQFNS(O-Glycosylation)TFR{Fuc:1; Hex:4; HexNAc:4} (S227)

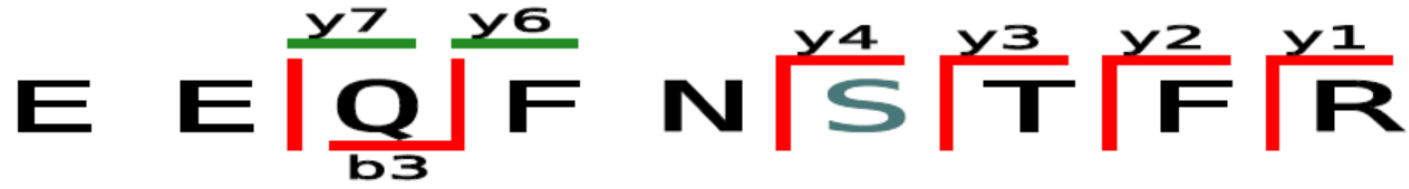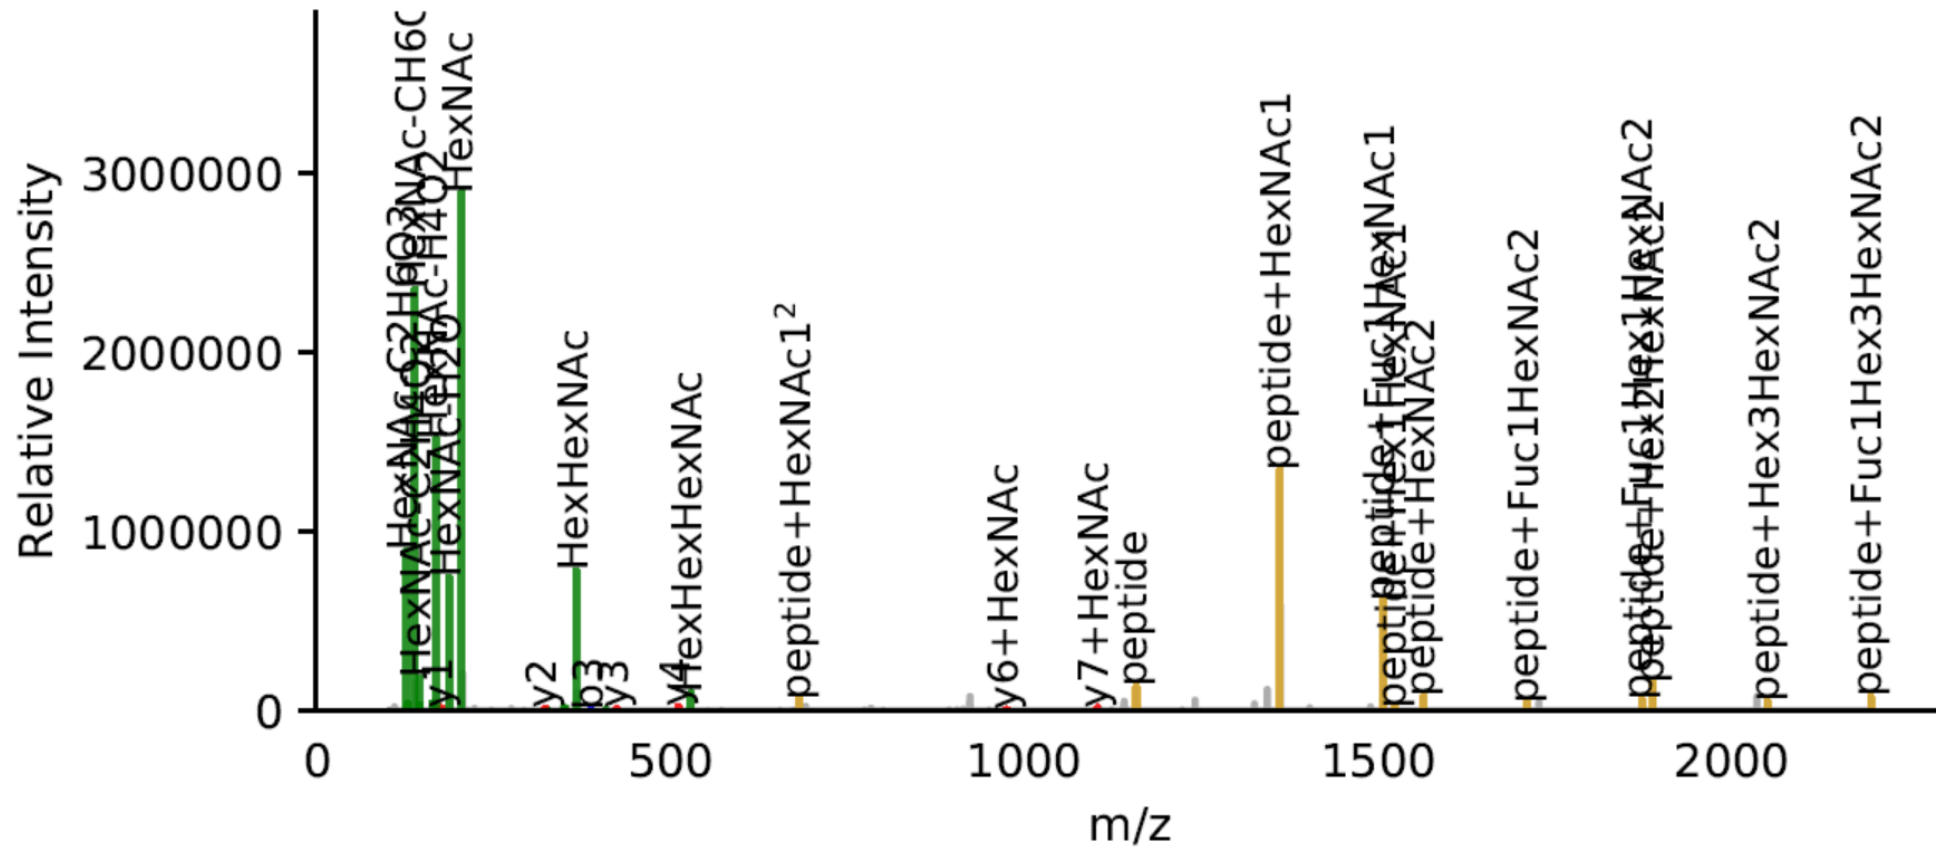

17. sp|P02679|FIBG\_HUMAN Fibrinogen gamma chain OS=Homo sapiens OX=9606 GN=FGG PE=1 SV=3  
 DLQSLEDILHLHQVEN(N-Glycosylation)K{Hex:5; HexNAc:4; Neu5Ac:1}N129

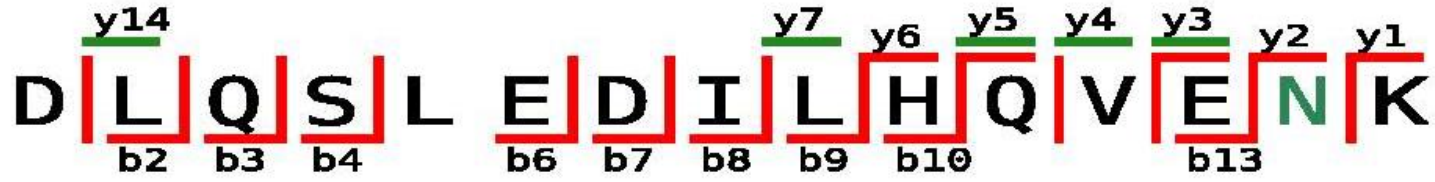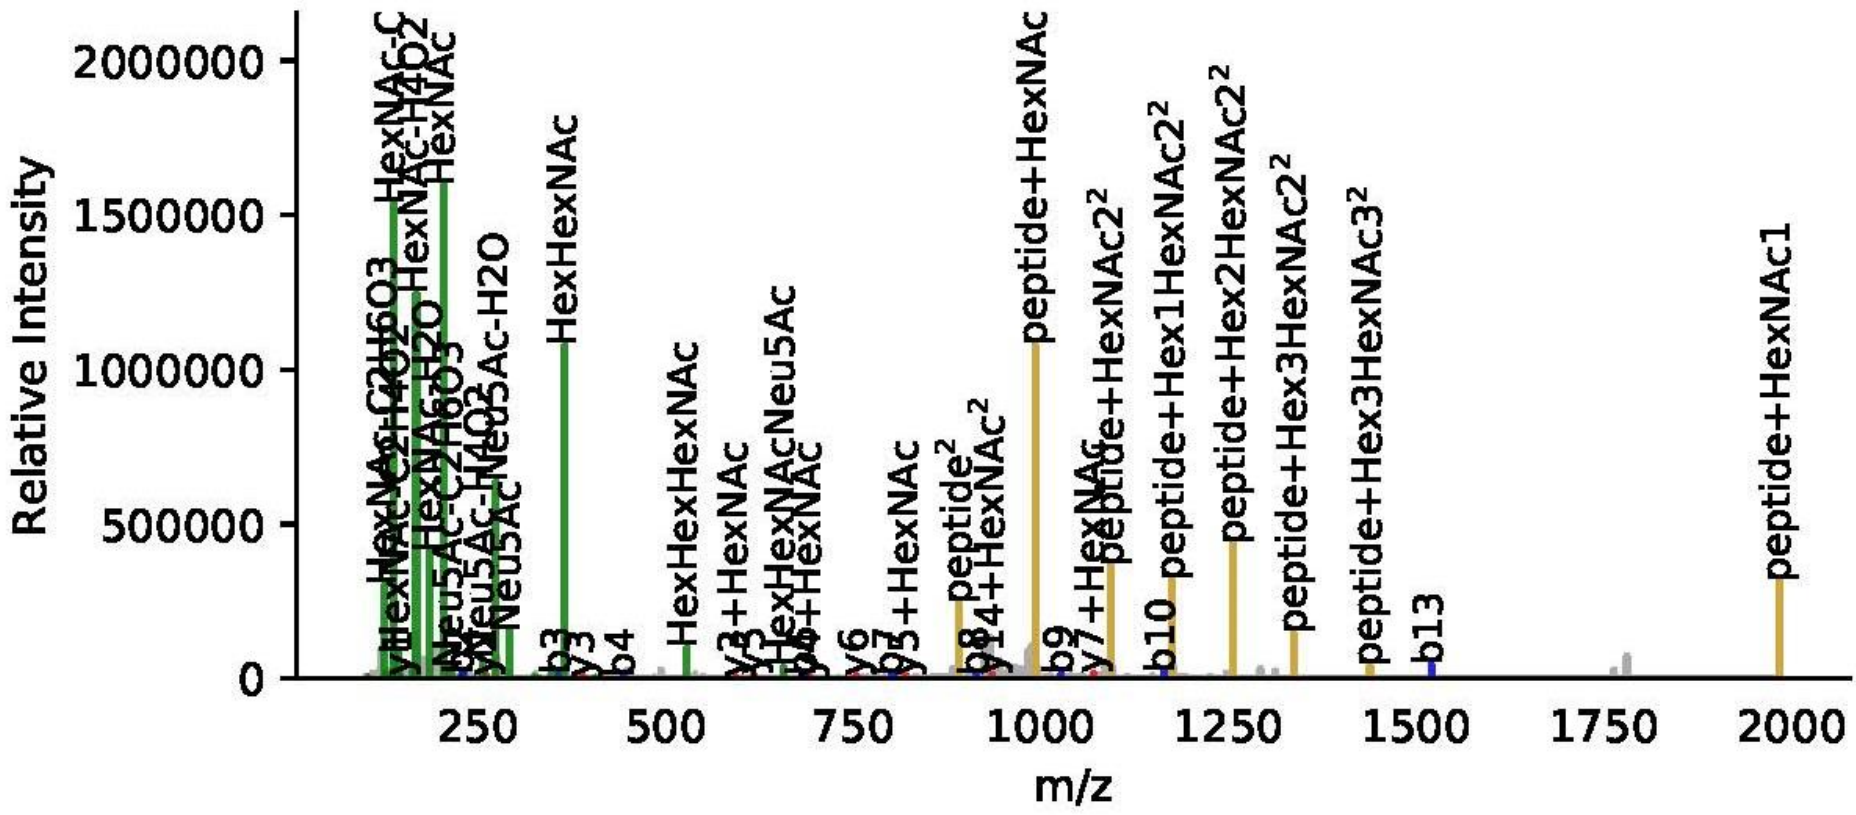

Supplement: mmc17.pdf [file mmc17.pdf]
